# Supplementary material for: Evaluating the effectiveness of organic chemistry textbooks in promoting representational fluency and understanding of 2D–3D diagrammatic relationships
Source: Royal Society of Chemistry journal article supplement (doi:10.1039/c3rp20166j), 2013-01-01
Supplement: c3rp20166j.pdf [file c3rp20166j.pdf]

**Table\_S1.pdf**

Rubric for text- and illustration-based evaluation of textbooks. (PDF, 6 pages, 145 KB).

**Table\_S2.pdf**

Rubric for evaluation of practice of projection construction. (PDF, 2 pages, 176 KB).

**Table\_S3.pdf**

Evaluations of textbook introductions to Newman projections. (PDF, 2 pages, 106 KB).

**Table\_S4.pdf**

Evaluations of textbook practice problems of Newman projections. (PDF, 1 page, 94 KB).

**Table\_S5.pdf**

Evaluations of textbook introductions to Fischer projections. (PDF, 2 pages, 176 KB).

**Table\_S6.pdf**

Evaluations of textbook practice problems of Fischer projections. (PDF, 1 page, 94 KB).

Table S1  
*Rubric for text- and illustration-based evaluation of textbooks*

| Analysis Areas                                     | Possible Scores | Description within NPs                                                                               | Description within FPs                                                                                                                                              | Rationale & Alignment to Principles                                                                                                                                                                                                                                    |                                                                                                                                                                                                              |
|----------------------------------------------------|-----------------|------------------------------------------------------------------------------------------------------|---------------------------------------------------------------------------------------------------------------------------------------------------------------------|------------------------------------------------------------------------------------------------------------------------------------------------------------------------------------------------------------------------------------------------------------------------|--------------------------------------------------------------------------------------------------------------------------------------------------------------------------------------------------------------|
| <i>Introduction of the Projection</i>              |                 |                                                                                                      |                                                                                                                                                                     |                                                                                                                                                                                                                                                                        |                                                                                                                                                                                                              |
| Purpose                                            | 0               | The purpose of the diagram is not discussed at its introduction                                      | The diagram is introduced only as a possible way to represent a molecule                                                                                            | <i>Principle 1:</i><br>As instructors, we feel it necessary that students are told why they are learning a new representation and how this will be used in the future.                                                                                                 |                                                                                                                                                                                                              |
|                                                    | 1               | A relationship to molecule conformation (NP) or stereochemistry (FP) is implied or explicitly stated | Introduction to diagrams is found in the chapter on “Conformation,” or is explicitly related to conformation                                                        |                                                                                                                                                                                                                                                                        | Introduction to diagrams is found in the chapter on “Stereochemistry”, or is described within discussions of three-dimensionality of chiral centers                                                          |
| Definitions of representation-specific conventions | 0               | Conventions of the representation are not defined                                                    | No discussion of what the lines and circles in the diagram represent or how the lines/circles are organized                                                         | <i>Principle 1:</i><br>Diagrams are a form of communication in chemistry. Therefore, a thorough understanding of the conventions of diagrammatic representations used in the discipline is critical, and novices should be explicitly introduced to these conventions. |                                                                                                                                                                                                              |
|                                                    | 1               | Definitions are given, but may not be fully developed                                                | The circle in the diagram is presented as representing the back carbon itself                                                                                       |                                                                                                                                                                                                                                                                        | Horizontal lines are discussed as representing bonds that come out of the page, or are projected toward the viewer, and vertical lines represent bonds that are going into the page, or away from the viewer |
|                                                    | 2               | Complete definitions are given                                                                       | The circle in the diagram is presented as representing the electron density around the carbon-carbon bond                                                           |                                                                                                                                                                                                                                                                        | N/A                                                                                                                                                                                                          |
| Relationship to other chemical representations     |                 |                                                                                                      |                                                                                                                                                                     |                                                                                                                                                                                                                                                                        |                                                                                                                                                                                                              |
| Relationship to the dash-wedge diagram (DW)        | 0               | DWs are not referenced when introducing NPs or FPs                                                   | DW diagrams are not referred to in the text, nor are they used in illustrations when introducing the NP                                                             | <i>Principles 1 &amp; 2:</i><br>Multiple representations can be used to depict the same molecule.                                                                                                                                                                      |                                                                                                                                                                                                              |
|                                                    | 1               | A relationship between NPs or FPs and the DW is implied                                              | DWs are used as an initial molecular representation in illustrations depicting a transformation to NPs, or DWs are referred to in the text but not in illustrations |                                                                                                                                                                                                                                                                        | <i>Principle 3:</i><br>The NP must be related to the “end-on” view of a molecule, and the FP to the eclipsed conformation of a molecule.                                                                     |
|                                                    | 2               | The relationship is explicitly stated                                                                | The DW is referred to in the text, as well as in illustrations; e.g., relating the NP as a DW rotated 90° towards the viewer                                        | The DW is referred to in the text, as well as in illustrations; e.g., horizontal lines are related to the “wedges” in DW diagrams, and vertical lines are related to the “dashes” in the DW                                                                            | <i>Principle 4:</i><br>Text and illustrations should be utilized in conjunction to establish tacit connections between different diagrammatic forms                                                          |

Table S1, Continued

| Analysis Areas                                            | Possible Scores | Description within NPs                                                             | Description within FPs                                                                                                              | Rationale & Alignment to Principles                                                                                              |                                                                                                                                                                                                        |
|-----------------------------------------------------------|-----------------|------------------------------------------------------------------------------------|-------------------------------------------------------------------------------------------------------------------------------------|----------------------------------------------------------------------------------------------------------------------------------|--------------------------------------------------------------------------------------------------------------------------------------------------------------------------------------------------------|
| <i>Introduction of the Projection, Continued</i>          |                 |                                                                                    |                                                                                                                                     |                                                                                                                                  |                                                                                                                                                                                                        |
| Relationship to other chemical representations, continued |                 |                                                                                    |                                                                                                                                     |                                                                                                                                  |                                                                                                                                                                                                        |
| Relationship to 3D representations                        | 0               | See Descriptions                                                                   | No 3D diagrams are used in the introduction of NPs                                                                                  | No 3D diagrams are used in the introduction of FPs                                                                               | <i>Principle 1:</i><br>Both 2D and 3D representations can be utilized to depict the same molecule, whether represented as a DW, NP, or FP                                                              |
|                                                           | 1               | The textbook explicitly illustrates the 2D-3D relationship of the NP or FP diagram | The text uses 3D representations, such as ball-and-stick models, to portray NPs and to illustrate how they are constructed/drawn    | The text uses 3D representations, such as ball-and-stick models, to portray FPs and to illustrate how they are constructed/drawn | <i>Principle 5:</i><br>Making explicit connections between the 2D and 3D nature of molecules reduces cognitive load by removing the need to abstract 3D information from the 2D diagram                |
| Relationship to other 2D representations                  | 0               | See Descriptions                                                                   | No other 2D chemical diagrams, or only DWs, are used in the introduction of NPs                                                     | No other 2D chemical diagrams, or only DWs, are used in the introduction of FPs                                                  | <i>Principle 1:</i><br>Multiple 2D representations of molecules exist aside from the commonly used DW, NP, and FP                                                                                      |
|                                                           | 1               | The textbook relates the NP or FP to other 2D diagrams aside from the DW           | The text uses other representations, such as saw-horse projections, to portray NPs and to illustrate how they are constructed/drawn | The text uses other representations, such as NPs, to portray FPs and to illustrate how they are constructed/drawn                | <i>Principle 2:</i><br>Molecules are dynamic entities that can rotate and adopt multiple conformations. The DW, FP, and NP can each be used in unique ways to represent these different conformations. |
| <i>Construction of the projection</i>                     |                 |                                                                                    |                                                                                                                                     |                                                                                                                                  |                                                                                                                                                                                                        |
| Stepwise Construction                                     | 0               | No stepwise approach is used                                                       | Construction of the NP is presented as a one-step process                                                                           | Construction of the FP is presented as a one-step process                                                                        | <i>Principle 5:</i><br>There are many critical details that must be addressed when diagramming 2D and 3D molecules and a step-wise process reduces cognitive load by simplifying this process.         |
|                                                           | 1               | A stepwise approach to construction of diagrams is used                            | Construction of the NP is presented as a series of steps necessary to create the representation in its entirety                     | Construction of the FP is presented as a series of steps necessary to create the representation in its entirety                  |                                                                                                                                                                                                        |
| Diagrammatic and text-based examples                      | 0               | Text and illustrations stand alone                                                 | Text and illustrations do not relate to one another                                                                                 | Text and illustrations do not relate to one another                                                                              | <i>Principle 4:</i><br>Novices benefit most when new material is presented in both written and illustrated formats. This allows the user to cement their understanding of the diagram conventions.     |
|                                                           | 1               | Text and illustrations are used in conjunction                                     | Text clearly describes illustrations and illustrations clearly reference the instructions given in the text                         | Text clearly describes illustrations and illustrations clearly reference the instructions given in the text                      |                                                                                                                                                                                                        |

Table S1, Continued

| Analysis Areas                                                       | Possible Scores | Description within NPs                                                                         | Description within FPs                                                                                                                                                                                                           | Rationale & Alignment to Principles                                                                                                                                                            |
|----------------------------------------------------------------------|-----------------|------------------------------------------------------------------------------------------------|----------------------------------------------------------------------------------------------------------------------------------------------------------------------------------------------------------------------------------|------------------------------------------------------------------------------------------------------------------------------------------------------------------------------------------------|
| <i>Construction of the Projection, Continued</i>                     |                 |                                                                                                |                                                                                                                                                                                                                                  |                                                                                                                                                                                                |
| Molecule conformation                                                |                 |                                                                                                |                                                                                                                                                                                                                                  |                                                                                                                                                                                                |
|                                                                      | 0               | The text does not address conformation of molecules                                            | At the point of introduction to the NP, the text does not differentiate between NPs of eclipsed and staggered molecules                                                                                                          | The text does not state that FPs can be formed from the eclipsed conformation only                                                                                                             |
| Discussion of molecular conformation with respect to representations | 1               | Text or illustrations show the importance of molecule conformation                             | The text states or illustrations imply that staggered molecules are drawn with 60° between front and back substituents, and eclipsed conformations are shown with substituents slightly offset                                   | The book states in the text or implies within illustrations the necessity of the eclipsed conformation prior to creating the FP                                                                |
|                                                                      | 2               | Text and illustrations are used to show importance of molecule conformation                    | The book states both in text and within illustrations the connection between substituent angles and conformations                                                                                                                | The book states both in text and within illustrations the importance of using the eclipsed conformation when creating FPs                                                                      |
| Illustrations and compound conformation                              | 0               | Illustrations imply importance of molecule conformation in creating diagrams                   | Illustrations showing the translation of DWs to NPs present the DW in only one conformation or do not address how the conformation of the NP changes as a result of the DW being in either an eclipsed or staggered conformation | Illustrations consistently depict the initial DW representation in an eclipsed conformation prior to FP construction, or only single-carbon-center molecules are shown in illustrations        |
|                                                                      | 1               | Illustrations depict representations of molecules in both staggered and eclipsed conformations | Illustrations showing the translation of both eclipsed and staggered molecules to NPs are shown, indicating the important modifications to the NP that occur as a result                                                         | Illustrations display the necessary rotation of a staggered molecule into the eclipsed conformation prior to creating the FP                                                                   |
| Viewing perspective                                                  |                 |                                                                                                |                                                                                                                                                                                                                                  |                                                                                                                                                                                                |
| Text discussion of viewing perspective                               | 0               | Multiple viewing perspectives are not discussed in the text                                    | The text does not state that multiple viewing perspectives may be used                                                                                                                                                           | No mention of viewing perspective is discussed in the text                                                                                                                                     |
|                                                                      | 1               | Viewing perspective is discussed explicitly in the text                                        | The text explicitly states that the NP can be made by viewing the initial representation from both the left and the right (only if the original molecule is represented as a DW)                                                 | The text explicitly states that the initial representation must be viewed so that the substituents in the molecule point <i>toward</i> the viewer and the backbone points away from the viewer |

*Principles 2-5:*  
 Explicit discussion of substituent relationships allows the user to understand how a diagram should be interpreted and “read” for chemical information.

With FPs, it is vital that novices understand the conventions of the diagram, and that these representations can only be created for molecules in the eclipsed conformations.

*Principle 3:*  
 NPs can be viewed from multiple perspectives and still be considered correct while FPs can only be viewed in the eclipsed format, with the substituents pointing toward the viewer; it is vital that novices be told this explicitly.

Table S1, Continued

| Analysis Areas                                                          | Possible Scores | Description within NPs                                                                                                         | Description within FPs                                                                                                                                                                                        | Rationale & Alignment to Principles                                                                                                                                                                                                                     |                                                                                                                                                                                                                                                                     |
|-------------------------------------------------------------------------|-----------------|--------------------------------------------------------------------------------------------------------------------------------|---------------------------------------------------------------------------------------------------------------------------------------------------------------------------------------------------------------|---------------------------------------------------------------------------------------------------------------------------------------------------------------------------------------------------------------------------------------------------------|---------------------------------------------------------------------------------------------------------------------------------------------------------------------------------------------------------------------------------------------------------------------|
| <i>Construction of the Projection, Continued</i>                        |                 |                                                                                                                                |                                                                                                                                                                                                               |                                                                                                                                                                                                                                                         |                                                                                                                                                                                                                                                                     |
| Viewing perspective, continued                                          |                 |                                                                                                                                |                                                                                                                                                                                                               |                                                                                                                                                                                                                                                         |                                                                                                                                                                                                                                                                     |
| Directionality of viewing perspectives depicted in illustrations        | 0               | Illustrations imply only one viewing perspective                                                                               | Illustrations use only one viewing direction, or the viewing direction cannot be determined due to the use of symmetric molecules                                                                             | <p><i>Principle 3:</i><br/>Multiple viewing perspective are used as referents for constructing new diagrams.</p> <p><i>Principle 4:</i><br/>When used in conjunction with text, illustrations can reify students' understanding of representations.</p> |                                                                                                                                                                                                                                                                     |
|                                                                         | 1               | Illustrations display the NP or FP from multiple viewing perspectives                                                          | Illustrations display possible perspectives from both the left and right of the original molecule (if the original molecule is a DW)                                                                          |                                                                                                                                                                                                                                                         | Illustrations consistently show the viewing perspective from only one direction, the bottom or left of the originally presented molecule, for example; the viewing direction cannot be determined due to the use of symmetric molecules                             |
| Viewing perspective of initial diagram and relationship of substituents | 0               | Illustrations do not indicate a viewing perspective of the initial molecular representation                                    | Illustrations include no perspective cue or the original molecule is not rotated towards the reader, and so the relationship of substituents as it relates to the reader's perspective is not indicated.      | <p><i>Principle 3:</i><br/>Illustrative cues are vital for novices attempting to understand how viewing perspective and directionality influence how representations are constructed.</p>                                                               |                                                                                                                                                                                                                                                                     |
|                                                                         | 1               | Illustrations explicitly indicate the direction of the viewing perspective and the resulting relationships of the substituents | Illustration cues are used to indicate a viewing perspective, OR the original molecule is rotated toward the reader, indicating the positions of the substituents in relation to the viewer's perspective     |                                                                                                                                                                                                                                                         | Illustrations that show a translation from DW (or ball & stick) representation to FP do not show a viewing perspective that the reader should take, such as an eye or stick person, and no relationship between the viewer and the substituent positions is implied |
|                                                                         | 2               | Illustrations indicate a viewing perspective and the resulting observer's view from this perspective                           | Illustrations include both a visual cue of viewing perspective on a given diagram (DW or ball & stick, for example) AND an image of this diagram from that perspective (such as a saw-horse representation)   |                                                                                                                                                                                                                                                         | Illustrations include an eye or stick person, for example, to indicate the viewer's perspective; OR a DW diagram is presented as pointing "outward" to the readers' perspective, thus implying the positional relationships of reader and substituents              |
|                                                                         |                 |                                                                                                                                | Illustrations include both a visual cue of viewing perspective on a given diagram (e.g., DW or ball & stick) AND an image of this diagram from that perspective (such as the bowtie representation of the DW) |                                                                                                                                                                                                                                                         |                                                                                                                                                                                                                                                                     |

Table S1, Continued

| Analysis Areas                                   | Possible Scores | Description within NPs                        | Description within FPs                                                                                                             | Rationale & Alignment to Principles                                                                                                                                                                                                                                                                     |
|--------------------------------------------------|-----------------|-----------------------------------------------|------------------------------------------------------------------------------------------------------------------------------------|---------------------------------------------------------------------------------------------------------------------------------------------------------------------------------------------------------------------------------------------------------------------------------------------------------|
| <i>Construction of the Projection, Continued</i> |                 |                                               |                                                                                                                                    |                                                                                                                                                                                                                                                                                                         |
| Carbon centers and diagram construction          | 0               | See descriptions                              | Only molecules with non-chiral centers are used                                                                                    | <i>Principle 3:</i><br>NP translations shown without using chiral centers lead to ambiguity regarding the viewing direction. Use of single-carbon-centered molecules in FPs deemphasizes the importance of the eclipsed conformation.                                                                   |
|                                                  | 1               | See descriptions                              | Only molecules with one chiral center, with 4 different substituents on a carbon, are used                                         |                                                                                                                                                                                                                                                                                                         |
|                                                  | 2               | See descriptions                              | Molecules with two chiral centers, with 4 different substituents on each carbon, are used                                          |                                                                                                                                                                                                                                                                                                         |
|                                                  | 3               | See descriptions                              | N/A                                                                                                                                |                                                                                                                                                                                                                                                                                                         |
| <i>Representations Throughout the Text</i>       |                 |                                               |                                                                                                                                    |                                                                                                                                                                                                                                                                                                         |
| FPs in discussion of carbohydrates               | 0               | No FPs in discussion                          | N/A                                                                                                                                | <i>Principles 3 &amp; 5:</i><br>Students are encouraged to establish referential connections between FPs and sugar and carbohydrate stereochemistry. More importantly, understanding FPs facilitates understanding of differences at chiral centers in sugars and carbohydrates (e.g., D vs. L sugars). |
|                                                  | 1               | FPs used in discussion                        | N/A                                                                                                                                |                                                                                                                                                                                                                                                                                                         |
| FPs in discussion of R/S Configuration           | 0               | No FPs in discussion                          | N/A                                                                                                                                | <i>Principle 5:</i><br>FPs allow the user to “see” multiple chiral centers more readily and therefore identify their spatial relationships and configurations more easily.                                                                                                                              |
|                                                  | 1               | FPs used in discussion                        | N/A                                                                                                                                |                                                                                                                                                                                                                                                                                                         |
| Viewing perspectives throughout the text         | 0               | A variety of viewing perspectives is not used | Less than 40%, or greater than 60% of NPs depict a left viewing perspective, or the resulting NP is the same from either direction | <i>Principle 3:</i><br>The use of multiple viewing perspectives allows students to better relate DWs, NPs, and FPs of various conformations to each other.                                                                                                                                              |
|                                                  | 1               | A variety of viewing perspectives is used     | Only 40-60% of viewing perspective shown of NPs use the left viewing perspective                                                   |                                                                                                                                                                                                                                                                                                         |

Table S1, Continued

| Analysis Areas                                        | Possible Scores | Description within NPs           | Description within FPs                                                                                                              | Rationale & Alignment to Principles                                                                                                                                                                |                                                                                                                                                                                                                                                                                                                                                                          |
|-------------------------------------------------------|-----------------|----------------------------------|-------------------------------------------------------------------------------------------------------------------------------------|----------------------------------------------------------------------------------------------------------------------------------------------------------------------------------------------------|--------------------------------------------------------------------------------------------------------------------------------------------------------------------------------------------------------------------------------------------------------------------------------------------------------------------------------------------------------------------------|
| <i>Representations Throughout the Text, Continued</i> |                 |                                  |                                                                                                                                     |                                                                                                                                                                                                    |                                                                                                                                                                                                                                                                                                                                                                          |
| Use of NPs in E2 Reactions                            | 0               | NPs are not used in E2 reactions | NPs are not used in the discussion and introduction to E2 reactions                                                                 | N/A                                                                                                                                                                                                | <i>Principle 5:</i><br>Use of the NP to pictorially represent the spatial relationship between leaving group and nucleophile is critical for understanding the processes involved in E2 reactions. Possessing a strong understanding of the NP would therefore reduce cognitive load.                                                                                    |
|                                                       | 1               | NPs are used in E2 reactions     | NPs are used in the introduction to the E2 reactions to introduce anti/syn-periplanar configurations                                | N/A                                                                                                                                                                                                |                                                                                                                                                                                                                                                                                                                                                                          |
| Rotations throughout the text                         |                 |                                  |                                                                                                                                     |                                                                                                                                                                                                    |                                                                                                                                                                                                                                                                                                                                                                          |
| Illustration of rotations                             | 0               | Rotation of NPs is not shown     | No illustration of the rotation around the carbon-carbon bond is included in the textbook                                           | N/A                                                                                                                                                                                                | <i>Principle 2:</i><br>It is important that novices understand that molecules are dynamic and, therefore, can rotate and adopt many conformations. However, it is likewise important that students be made aware that not all rotational movement results in the formation of the same conformer and may, instead, result in isomers with different chemical properties. |
|                                                       | 1               | One carbon rotation              | In illustrations, one carbon is shown as static, while the other can rotate                                                         | N/A                                                                                                                                                                                                |                                                                                                                                                                                                                                                                                                                                                                          |
|                                                       | 2               | Two carbon rotation              | An illustration depicts that both carbons can rotate independently of one another                                                   | N/A                                                                                                                                                                                                |                                                                                                                                                                                                                                                                                                                                                                          |
| Textual discussion of rotations                       | 0               | No discussion of rotation        | The text includes no discussion about the rotation around the carbon-carbon bond of a molecule                                      | No discussion of the rules of FP rotation                                                                                                                                                          |                                                                                                                                                                                                                                                                                                                                                                          |
|                                                       | 1               | Some discussion of rotation      | A discussion of rotation around the carbon-carbon bond is included, but is vague as to how this rotation occurs (one carbon or two) | A discussion of the FP rotation rules is included, including that FPs must not be rotated 90° as this changes the implied stereochemistry of the molecule, while a rotation of 180° is permissible |                                                                                                                                                                                                                                                                                                                                                                          |
|                                                       | 2               | Complete discussion of rotation  | The text explicitly states that both carbon atoms can rotate independently of one another                                           | N/A                                                                                                                                                                                                |                                                                                                                                                                                                                                                                                                                                                                          |

Table S2

*Rubric for evaluation of practice of projection construction*

| Analysis Areas                                              | Possible Scores | Description within NPs                                       | Description within FPs                                                                                                                                                                             | Rationale                                                                                                                                                                                                                                                                                                                                                                                                      |
|-------------------------------------------------------------|-----------------|--------------------------------------------------------------|----------------------------------------------------------------------------------------------------------------------------------------------------------------------------------------------------|----------------------------------------------------------------------------------------------------------------------------------------------------------------------------------------------------------------------------------------------------------------------------------------------------------------------------------------------------------------------------------------------------------------|
| Practice problems                                           | 0               | No practice problems                                         | Text does not include practice problems dealing with the construction of NPs                                                                                                                       | It is important for students to practice translating between different representations if they are to develop metarepresentational competence.                                                                                                                                                                                                                                                                 |
|                                                             | 1               | Practice problems included                                   | Text includes practice problems dealing with NP construction                                                                                                                                       |                                                                                                                                                                                                                                                                                                                                                                                                                |
| Viewing perspective(s) in practice                          |                 |                                                              |                                                                                                                                                                                                    |                                                                                                                                                                                                                                                                                                                                                                                                                |
| Required or implied viewing perspectives and directionality | 0               | No viewing perspective provided                              | Practice problems do not ask the student to use a specific viewing perspective                                                                                                                     | Translating DW representations to NPs result in only one correct answer IF a viewing perspective is required. Not specifying a viewing direction can lead to ambiguity and confusion as to how to construct the NP properly.<br><br>With FPs, it is vital that the student learns to put the molecule in the eclipsed formation, and approach this from the appropriate position relative to the substituents. |
|                                                             | 1               | Specific viewing perspective provided                        | Students are asked to use a specific viewing perspective in the construction of a NP                                                                                                               |                                                                                                                                                                                                                                                                                                                                                                                                                |
| Variation of viewing perspective                            | 0               | Skewed number of viewing perspectives                        | If score of "1" above:<br>Less than 40%, or greater than 60%, of viewing perspectives requested were from the left, or the resulting NP is the same when constructed from either viewing direction | It is important that students should have an opportunity to translate between representations using multiple viewing perspectives. This addresses the misconception that only a single viewing perspective is "correct."                                                                                                                                                                                       |
|                                                             | 1               | Even number of viewing perspectives requested                | If score of "1" above:<br>Only 40-60% of the requested viewing perspectives are from the left                                                                                                      |                                                                                                                                                                                                                                                                                                                                                                                                                |
| Viewing perspective and nomenclature                        | 0               | No relationship between viewing perspective and nomenclature | Requested viewing perspectives do not correspond to nomenclature of the molecule, or no viewing directions were specifically requested                                                             | Requiring alignment with molecular nomenclature again leads to only one correct answer for each problem, allows students to relate this information to previously acquired knowledge, and continues to align students to the common conventions associated with the diagrams.                                                                                                                                  |
|                                                             | 1               | Viewing perspective corresponds to nomenclature              | Requested viewing perspectives correspond to the nomenclature of the molecule                                                                                                                      |                                                                                                                                                                                                                                                                                                                                                                                                                |



Table S2, Continued

| Analysis Areas                                       | Possible Scores | Description within NPs                                               | Description within FPs                                                                                                                                                                                | Rationale                                                                                                                                                                |                                                                                                                                                                                                                                                                                                                                                     |
|------------------------------------------------------|-----------------|----------------------------------------------------------------------|-------------------------------------------------------------------------------------------------------------------------------------------------------------------------------------------------------|--------------------------------------------------------------------------------------------------------------------------------------------------------------------------|-----------------------------------------------------------------------------------------------------------------------------------------------------------------------------------------------------------------------------------------------------------------------------------------------------------------------------------------------------|
| Molecule conformations and diagram frameworks        | 0               | Basic framework of the diagram is given in practice problems         | The basic circle and lines of the NP are provided in a synonymous conformation as that of the initial representation, and students are only required to fill in substituents in appropriate positions | Practice problems include molecules in only one conformer; if eclipsed, students do not have to rotate the molecule prior to fitting to the FP framework                 | The framework indicates the spatial relationships of the substituents on neighboring carbons of the original molecule. It is important for students be able to identify this framework on their own with NPs and rotate molecules accordingly to fit the framework of the FP as they scaffold their knowledge of the 3D relationships of molecules. |
|                                                      | 1               | Student construction of the diagram is required                      | Students must draw the front and back carbon substituents and the conformation of the diagram on their own, thus having to distinguish between eclipsed or staggered conformations of the NPs         | Practice problems include initial representations of both eclipsed and staggered molecules to be translated into FPs, requiring students to master conventions of the FP |                                                                                                                                                                                                                                                                                                                                                     |
| Reverse construction                                 | 0               | Practice problems include only transformations from DW to NPs or FPs | Students are only asked to transform DW diagrams to NPs, not the reverse                                                                                                                              | Students are only asked to transform DW diagrams to FPs, not the reverse                                                                                                 | Metarepresentational competence can be developed, in part, by a more thorough understanding of the relationship between representations, which can be accentuated through practice in translating between the DW, NP, and FP                                                                                                                        |
|                                                      | 1               | Practice problems include reverse translations to DW                 | Problems asking students to translate NPs to DWs are included in the practice problem section                                                                                                         | Problems asking students to translate FPs to DWs are included in the practice problem section                                                                            |                                                                                                                                                                                                                                                                                                                                                     |
| Carbon centers in translation and construction tasks | 0               | See descriptions                                                     | In translation and construction tasks, only molecules with non-chiral centers are used                                                                                                                | Only molecules with one non-chiral carbon center are used                                                                                                                | With NPs, the use of chiral centers in practice problems creates specific locations of substituents in the “correct” answer that would not be apparent if all substituents were the same                                                                                                                                                            |
|                                                      | 1               | See descriptions                                                     | In translation and construction tasks, molecules with one chiral center are used                                                                                                                      | Only single-carbon-center molecules are used, but these molecules are chiral                                                                                             |                                                                                                                                                                                                                                                                                                                                                     |
|                                                      | 2               | See descriptions                                                     | In translation and construction tasks, molecules with two chiral centers are used                                                                                                                     | If multi-carbon-center molecules are used in illustrations, none or only one is chiral                                                                                   | FPs are intended to allow users to see multiple chiral centers quickly and easily; students need practice with such molecules.                                                                                                                                                                                                                      |
|                                                      | 3               | See descriptions                                                     | N/A                                                                                                                                                                                                   | Multi-carbon-center molecules are used in illustrations and each are chiral                                                                                              |                                                                                                                                                                                                                                                                                                                                                     |
| Real-world applications of representations           | 0               | See descriptions                                                     | Students are not asked to use NPs in determining the lowest and/or highest energy configurations of molecules                                                                                         | Students are not asked to use FPs when finding chiral center configurations in practice problems                                                                         | These representations have multiple applications that are commonly introduced concurrently with the projections themselves. Providing students with an opportunity to understand how these representations are used in the real world is critical.                                                                                                  |
|                                                      | 1               | See descriptions                                                     | Practice problems include NPs for students to use in determining the lowest and/or highest energy configurations of molecules                                                                         | Practice problems give students FPs to use in finding chiral center configurations                                                                                       |                                                                                                                                                                                                                                                                                                                                                     |
|                                                      | 2               | See descriptions                                                     | Practice problems require students to create NPs in the process of determining the lowest and/or highest energy configurations                                                                        | Practice problems require students to create FPs in the process of finding chiral center configurations                                                                  |                                                                                                                                                                                                                                                                                                                                                     |

Table S3  
*Evaluations of textbook introductions to Newman projections*

|                                                                         | Bruice | Carey & Giuliano | Klein <sup>a</sup> | Klein <sup>b</sup> | Loudon | McMurry | Wade |
|-------------------------------------------------------------------------|--------|------------------|--------------------|--------------------|--------|---------|------|
| <b>Introduction to the Newman Projection (7)</b>                        |        |                  |                    |                    |        |         |      |
| Purpose                                                                 | 1      | 1                | 1                  | 1                  | 1      | 1       | 1    |
| Definition of representation-specific symbols                           | 1      | 1                | 1                  | 1                  | 1      | 1       | 1    |
| <b>Relationship to other chemical representations</b>                   |        |                  |                    |                    |        |         |      |
| Relationship to dash-wedge diagram                                      | 1      | 1                | 2                  | 2                  | 1      | 0       | 1    |
| Relationship to 3D representations                                      | 0      | 1                | 0                  | 0                  | 1      | 1       | 0    |
| Relationship to other 2D representations                                | 0      | 1                | 1                  | 0                  | 0      | 1       | 1    |
| <b>Construction of the Newman Projection (11)</b>                       |        |                  |                    |                    |        |         |      |
| Stepwise Construction                                                   | 0      | 0                | 1                  | 1                  | 1      | 0       | 0    |
| Diagrammatic and text-based examples                                    | 1      | 1                | 1                  | 1                  | 1      | 1       | 1    |
| <b>Molecule Conformation</b>                                            |        |                  |                    |                    |        |         |      |
| Discussion of molecule conformation with respect to representations     | 1      | 1                | 1                  | 1                  | 2      | 1       | 2    |
| Illustrations and compound conformation                                 | 1      | 1                | 0                  | 0                  | 0      | 1       | 1    |
| <b>Viewing perspective</b>                                              |        |                  |                    |                    |        |         |      |
| Text discussion of viewing perspective                                  | 0      | 0                | 0                  | 0                  | 1      | 0       | 0    |
| Directionality of viewing perspectives in illustrations                 | 0      | 0                | 0                  | 0                  | 0      | 0       | 0    |
| Viewing perspective of initial diagram and relationship of substituents | 0      | 1                | 2                  | 1                  | 2      | 1       | 1    |
| Carbon centers and diagram construction                                 | 0      | 0                | 2                  | 0                  | 0      | 0       | 0    |

Table S3, continued

| Representations Throughout the Text (6)  |   |    |    |    |    |    |    |
|------------------------------------------|---|----|----|----|----|----|----|
| Viewing perspectives throughout the text | c | 0  | 0  | 0  | 0  | 0  | 0  |
| Use of NPs in E2 reactions               | 0 | 0  | 1  | 1  | 0  | 1  | 1  |
| Rotations throughout the text            |   |    |    |    |    |    |    |
| Illustrations of NP rotations            | 2 | 0  | 2  | 1  | 1  | 1  | 1  |
| Textual discussion of rotations          | 1 | 1  | 1  | 2  | 2  | 1  | 2  |
| Total (24)                               | 9 | 10 | 16 | 12 | 14 | 11 | 13 |

*Note:*

a: Organic Chemistry, 2012

b: Organic Chemistry as a Second Language, 2006 & 2008

c: One or fewer NP translations was illustrated in the later textbook sections that were reviewed

Table S4  
*Evaluations of textbook practice problems of Newman projections*

|                                                             | Bruice | Carey & Giuliano | Klein <sup>a</sup> | Klein <sup>b</sup> | Loudon | McMurry | Wade |
|-------------------------------------------------------------|--------|------------------|--------------------|--------------------|--------|---------|------|
| Practice problems                                           | 1      | 1                | 1                  | 1                  | 1      | 1       | 1    |
| Viewing perspective at practice                             |        |                  |                    |                    |        |         |      |
| Required or implied viewing perspectives and directionality | 1      | 0                | 1                  | 1                  | 1      | 0       | 1    |
| Variation of viewing perspective                            | c      | d                | 0                  | 0                  | c      | d       | c    |
| Viewing perspective and nomenclature                        | 1      | 1                | 1                  | 1                  | 1      | 1       | 1    |
| Molecule conformation and diagram frameworks                | 1      | 1                | 1                  | 1                  | 1      | 1       | 1    |
| Reverse construction                                        | 0      | 0                | 1                  | 0                  | 1      | 0       | 0    |
| Carbon centers in translation and construction tasks        | 0      | 0                | 1                  | 0                  | 0      | 0       | 0    |
| Real-world applications of representations                  | 1      | 2                | 1                  | 1                  | 2      | 1       | 2    |
| Total (10)                                                  | 5      | 5                | 7                  | 5                  | 7      | 4       | 6    |

*Notes:*

a: Organic Chemistry, 2012

b: Organic Chemistry as a Second Language, 2006 & 2008

c: No translation tasks were included in the book. Construction tasks were from name or molecular formula only, and so no viewing perspective could be identified

d: Translation practice problems did not ask for specific viewing perspectives

Table S5  
*Evaluations of textbook introductions to Fischer projections*

|                                                                         | Bruice | Carey & Giuliano | Klein <sup>a</sup> | Klein <sup>b</sup> | Loudon | McMurry | Wade |
|-------------------------------------------------------------------------|--------|------------------|--------------------|--------------------|--------|---------|------|
| <b>Introduction to the Fischer Projection (6)</b>                       |        |                  |                    |                    |        |         |      |
| Purpose                                                                 | 1      | 1                | 1                  | 1                  | 1      | 1       | 1    |
| Definition of representation-specific symbols                           | 1      | 1                | 1                  | 1                  | 1      | 1       | 1    |
| Relationship to other chemical representations                          |        |                  |                    |                    |        |         |      |
| Relationship to dash-wedge diagram                                      | 1      | 1                | 2                  | 2                  | 1      | 1       | 2    |
| Relationship to 3D representations                                      | 0      | 1                | 0                  | 0                  | 0      | 1       | 1    |
| Relationship to other representations                                   | 0      | 0                | 0                  | 0                  | 0      | 0       | 0    |
| <b>Construction of the Fischer Projection (12)</b>                      |        |                  |                    |                    |        |         |      |
| Stepwise Construction                                                   | 0      | 0                | 0                  | 1                  | 1      | 0       | 0    |
| Diagrammatic and text-based examples                                    | 0      | 1                | 1                  | 1                  | 1      | 1       | 1    |
| Molecule Conformation                                                   |        |                  |                    |                    |        |         |      |
| Discussion of molecule conformation with respect to representations     | 0      | 1                | 0                  | 0                  | 2      | 1       | 0    |
| Illustrations and compound conformation                                 | 0      | 1                | 0                  | 1                  | 0      | 0       | 0    |
| Viewing perspective                                                     |        |                  |                    |                    |        |         |      |
| Text discussion of viewing perspective                                  | 1      | 1                | 0                  | 1                  | 1      | 0       | 1    |
| Directionality of viewing perspectives in illustrations                 | 0      | 0                | 0                  | 0                  | 1      | 1       | 0    |
| Viewing perspective of initial diagram and relationship of substituents | 0      | 1                | 0                  | 2                  | 2      | 2       | 2    |
| Carbon centers and diagram construction                                 | 1      | 3                | 3                  | 3                  | 3      | 1       | 1    |

Table S5, continued

| Representations Throughout the Text (4)  |   |    |    |    |    |    |    |
|------------------------------------------|---|----|----|----|----|----|----|
| FPs in discussion of carbohydrates       | 1 | 1  | 1  | c  | 1  | 1  | 1  |
| FPs in discussion of R/S configurations  | 1 | 1  | 1  | 1  | 1  | 1  | 1  |
| Viewing perspectives throughout the text | d | 0  | d  | d  | d  | e  | d  |
| Rotations throughout the text            |   |    |    |    |    |    |    |
| Textual discussion of rotations          | 1 | 0  | 0  | 0  | 1  | 1  | 1  |
| Total (22)                               | 8 | 14 | 10 | 14 | 17 | 13 | 13 |

*Notes:*

a: Organic Chemistry, 2012

b: Organic Chemistry as a Second Language, 2006 & 2008

c: Textbook did not include a carbohydrate section

d: One or fewer FP translations was illustrated in the later textbook sections that were reviewed

e: FPs were introduced within the sugars chapter, and so does not fit with "Representations Throughout the Text"

Table S6  
*Evaluations of textbook practice problems of Fischer projections*

|                                                             | Bruice         | Carey & Giuliano | Klein <sup>a</sup> | Klein <sup>b</sup> | Loudon         | McMurry          | Wade             |
|-------------------------------------------------------------|----------------|------------------|--------------------|--------------------|----------------|------------------|------------------|
| Practice problems                                           | 1              | 1                | 1                  | 0                  | 1              | 1                | 1                |
| Viewing perspective at practice                             |                |                  |                    |                    |                |                  |                  |
| Required or implied viewing perspectives and directionality | 1 <sup>d</sup> | 1 <sup>d</sup>   | 1 <sup>e</sup>     | c                  | 1 <sup>d</sup> | 1 <sup>d,e</sup> | 1 <sup>d,e</sup> |
| Variation of viewing perspective                            | f              | f                | f                  | c                  | f              | f                | f                |
| Viewing perspective and nomenclature                        | 0              | 0                | 0                  | c                  | 0              | 0                | 0                |
| Molecule conformation and diagram frameworks                | d              | d                | 0                  | c                  | d              | 1                | 1                |
| Reverse construction                                        | 0              | 0                | 1                  | 0                  | 0              | 1                | 1                |
| Carbon centers in translation and construction tasks        | 3              | 3                | 2                  | c                  | 3              | 2                | 3                |
| Real-world applications of representations                  | 1              | 1                | 1                  | 1                  | 1              | 2                | 1                |
| Total (11)                                                  | 6              | 6                | 6                  | 1                  | 6              | 8                | 8                |

*Note:*

a: Organic Chemistry, 2012

b: Organic Chemistry as a Second Language, 2006 & 2008

c: No practice problems in FP construction were included in this textbook, therefore no further scores regarding such problems are included

d: Construction tasks were from name or molecular formula only, so no viewing perspective could be identified or framework employed

e: Practice problems provided staggered molecules from which to translate to FPS

f: Practice problems did not imply specific viewing perspective
